## **Neuron-dependent tuft cell expansion initiates sinonasal allergic Type 2 inflammation**

Jorge F. Ortiz-Carpena<sup>1,2</sup>, Juan M. Inclan-Rico<sup>1</sup>, Christopher F. Pastore<sup>1</sup>, Li-Yin Hung<sup>1</sup>, William B. Wilkerson<sup>3</sup>, Molly B. Weiner<sup>1,2</sup>, Cailu Lin<sup>4</sup>, Maria Elena Gentile<sup>5</sup>, Noam A. Cohen, Ishmail Abdus Saboor<sup>6</sup>, Andrew E. Vaughan<sup>5</sup>, Heather L. Rossi<sup>1</sup>, and De'Broski R. Herbert\*<sup>1</sup>

<sup>1</sup>Department of Pathobiology, School of Veterinary Medicine, University of Pennsylvania, Philadelphia, Pennsylvania, USA.

<sup>2</sup>Immunology Graduate Group, Perelman School of Medicine, University of Pennsylvania, Philadelphia, Pennsylvania, USA.

<sup>3</sup>Department of Biochemistry & Molecular Biology and Data Analytics, Dickinson College, Carlisle, Pennsylvania, USA.

<sup>4</sup>Monell Chemical Senses Center, Philadelphia, Pennsylvania, USA.

<sup>5</sup> Department of Biomedical Sciences, School of Veterinary Medicine, University of Pennsylvania, Philadelphia, Pennsylvania, USA.

<sup>6</sup> Department of Biological Sciences, Zuckerman Institute, Columbia University, New York City, New York, USA

Department of Otorhinolaryngology-Head and Neck Surgery, Perelman School of Medicine, University of Pennsylvania, Philadelphia, PA, USA;

Corporal Michael J. Crescenz VA Medical Center, Philadelphia, PA, USA

Monell Chemical Senses Center, Philadelphia PA, USA

"The authors have withdrawn this manuscript owing to inaccuracies in the calculation of tuft cell numbers and errors in the selection of immunofluorescence images used to support our claims. Therefore, the authors do not wish this work to be cited as reference for the project. If you have any questions, please contact the corresponding author."
